# Supplementary material for: Description of Twenty-Nine Animal Hoarding Cases in Italy: The Impact on Animal Welfare
Source: MDPI journal article supplement (doi:10.3390/ani13182968), 2023-09-20
Supplement: s1 [file s1]

## Description form on hoarders

### 1. The origin of the complaint:

|                                                                                |                                                                                         |                                                                                      |
|--------------------------------------------------------------------------------|-----------------------------------------------------------------------------------------|--------------------------------------------------------------------------------------|
| <input type="checkbox"/> Stranger                                              | <input type="checkbox"/> Friend or acquaintance                                         | <input type="checkbox"/> Non-living relative                                         |
| <input type="checkbox"/> Family member or<br><input type="checkbox"/> roommate | <input type="checkbox"/> Agency for social services                                     | <input type="checkbox"/> Service person visiting a<br><input type="checkbox"/> house |
| <input type="checkbox"/> Owner/tenant/neighbors                                | <input type="checkbox"/> Fire brigades or<br><input type="checkbox"/> police department | <input type="checkbox"/> Veterinarian                                                |
| <input type="checkbox"/> Anonymous/ passer-by                                  | Altro                                                                                   |                                                                                      |

### 2. People living in the home (age, sex, and relationship with the hoarder):

| person  | age | gender                                          | Type of relationship with the hoarder |
|---------|-----|-------------------------------------------------|---------------------------------------|
| hoarder |     | <input type="radio"/> M <input type="radio"/> F |                                       |
| hoarder |     | <input type="radio"/> M <input type="radio"/> F |                                       |
| hoarder |     | <input type="radio"/> M <input type="radio"/> F |                                       |
| hoarder |     | <input type="radio"/> M <input type="radio"/> F |                                       |

### 3. Marital status of the hoarder:

|                              |                               |                                |                                |                                         |                               |
|------------------------------|-------------------------------|--------------------------------|--------------------------------|-----------------------------------------|-------------------------------|
| <input type="radio"/> Single | <input type="radio"/> married | <input type="radio"/> divorced | <input type="radio"/> widow/or | <input type="radio"/> cohabit/companion | <input type="radio"/> unknown |
|------------------------------|-------------------------------|--------------------------------|--------------------------------|-----------------------------------------|-------------------------------|

### 4. Residence type:

|                                    |                                             |                                        |
|------------------------------------|---------------------------------------------|----------------------------------------|
| <input type="radio"/> single house | <input type="radio"/> Apartment/condominium | <input type="radio"/> Other (describe) |
|------------------------------------|---------------------------------------------|----------------------------------------|

### 5. Job of the hoarder:

---

### 6. Other stakeholders involved in the case:

|                                |                           |                          |                                    |
|--------------------------------|---------------------------|--------------------------|------------------------------------|
| Department of Mental Health    | <input type="radio"/> YES | <input type="radio"/> NO | <input type="radio"/> Not detected |
| Fire department                | <input type="radio"/> YES | <input type="radio"/> NO | <input type="radio"/> Not detected |
| Local police                   | <input type="radio"/> YES | <input type="radio"/> NO | <input type="radio"/> Not detected |
| Foresters                      | <input type="radio"/> YES | <input type="radio"/> NO | <input type="radio"/> Not detected |
| Social assistants              | <input type="radio"/> YES | <input type="radio"/> NO | <input type="radio"/> Not detected |
| Department of Child Protection | <input type="radio"/> YES | <input type="radio"/> NO | <input type="radio"/> Not detected |
| Tribunal                       | <input type="radio"/> YES | <input type="radio"/> NO | <input type="radio"/> Not detected |
| Other (indicate)               | <input type="radio"/> YES | <input type="radio"/> NO | <input type="radio"/> Not detected |

### 7. Degree of environmental neglect:

| Area of the house | degree of disorder         |                                |                                |                              |                                    |
|-------------------|----------------------------|--------------------------------|--------------------------------|------------------------------|------------------------------------|
| Bedroom           | <input type="radio"/> None | <input type="radio"/> moderate | <input type="radio"/> Oevident | <input type="radio"/> severe | <input type="radio"/> Not detected |
| Bathroom          | <input type="radio"/> None | <input type="radio"/> moderate | <input type="radio"/> Oevident | <input type="radio"/> severe | <input type="radio"/> Not detected |
| Living room       | <input type="radio"/> None | <input type="radio"/> moderate | <input type="radio"/> Oevident | <input type="radio"/> severe | <input type="radio"/> Not detected |
| Kitchen           | <input type="radio"/> None | <input type="radio"/> moderate | <input type="radio"/> Oevident | <input type="radio"/> severe | <input type="radio"/> Not detected |
| Dining room       | <input type="radio"/> None | <input type="radio"/> moderate | <input type="radio"/> Oevident | <input type="radio"/> severe | <input type="radio"/> Not detected |
| Stairs            | <input type="radio"/> None | <input type="radio"/> moderate | <input type="radio"/> Oevident | <input type="radio"/> severe | <input type="radio"/> Not detected |
| Corridor          | <input type="radio"/> None | <input type="radio"/> moderate | <input type="radio"/> Oevident | <input type="radio"/> severe | <input type="radio"/> Not detected |
| Under roof        | <input type="radio"/> None | <input type="radio"/> moderate | <input type="radio"/> Oevident | <input type="radio"/> severe | <input type="radio"/> Not detected |
| Outdoor area      | <input type="radio"/> None | <input type="radio"/> moderate | <input type="radio"/> Oevident | <input type="radio"/> severe | <input type="radio"/> Not detected |
| Basement          | <input type="radio"/> None | <input type="radio"/> moderate | <input type="radio"/> Oevident | <input type="radio"/> severe | <input type="radio"/> Not detected |
| Garage            | <input type="radio"/> None | <input type="radio"/> moderate | <input type="radio"/> Oevident | <input type="radio"/> severe | <input type="radio"/> Not detected |

8. The following appliances/utilities were functional:

|                 |                                                                                       |                      |                                                                                       |
|-----------------|---------------------------------------------------------------------------------------|----------------------|---------------------------------------------------------------------------------------|
| Stove/heaters   | <input type="radio"/> YES <input type="radio"/> NO <input type="radio"/> Not detected | Refrigerator/freezer | <input type="radio"/> YES <input type="radio"/> NO <input type="radio"/> Not detected |
| Oven            | <input type="radio"/> YES <input type="radio"/> NO <input type="radio"/> Not detected | Bathroom sink        | <input type="radio"/> YES <input type="radio"/> NO <input type="radio"/> Not detected |
| Sink            | <input type="radio"/> YES <input type="radio"/> NO <input type="radio"/> Not detected | Toilet               | <input type="radio"/> YES <input type="radio"/> NO <input type="radio"/> Not detected |
| Electricity     | <input type="radio"/> YES <input type="radio"/> NO <input type="radio"/> Not detected | Water heater         | <input type="radio"/> YES <input type="radio"/> NO <input type="radio"/> Not detected |
| Washing machine | <input type="radio"/> YES <input type="radio"/> NO <input type="radio"/> Not detected | Shower/bath          | <input type="radio"/> YES <input type="radio"/> NO <input type="radio"/> Not detected |

9. List number, type, clinical and behavioural signs of all accumulated animals:

| Kind of animal          | Number of animals in altered clinical and behavioral conditions | Number of animals seriously ill, injured or extremely malnourished | Number of deaths | Total |
|-------------------------|-----------------------------------------------------------------|--------------------------------------------------------------------|------------------|-------|
| Dogs                    |                                                                 |                                                                    |                  |       |
| Cats                    |                                                                 |                                                                    |                  |       |
| Birds                   |                                                                 |                                                                    |                  |       |
| Reptiles                |                                                                 |                                                                    |                  |       |
| Small mammals(describe) |                                                                 |                                                                    |                  |       |
| Horses                  |                                                                 |                                                                    |                  |       |
| Sheep/goats             |                                                                 |                                                                    |                  |       |
| NOTES                   |                                                                 |                                                                    |                  |       |

10. Motivation provided by the hoarder:

|                                                                                   |
|-----------------------------------------------------------------------------------|
| <input type="checkbox"/> Save the animals                                         |
| <input type="checkbox"/> Love for animals                                         |
| <input type="checkbox"/> Animals as children                                      |
| <input type="checkbox"/> Nobody else wanted to take care of animals               |
| <input type="checkbox"/> Animals are the only friend or companion of the hoarder. |

11. Case resolution:

- a. All the animals were taken away (seizure)
- b. Some animals were taken away (partial seizure)
- c. The accumulator has been banned from owning animals for a period
- d. The accumulator has agreed to continue to be monitored
- e. The accumulator has been subjected to psychiatric examination or mandatory medical treatment
- f. The accumulator has been placed in a rehabilitation structure

g. The accumulator has been submitted to legal procedure.
